# Supplementary material for: Towards Defining Molecular Determinants Recognized by Adaptive Immunity in Allergic Disease: An Inventory of the Available Data
Source: PubMed Central journal article supplement (PMC3042621; doi:10.1155/2010/628026), 2011-02-13
Supplement: 628026.f2.pdf [file 628026.f2.pdf]

**Supplementary Table 1. Contact Allergens**

| <b>CATEGORY</b>                                                                                                                                           | <b>All T cell</b> | <b>CD4/ Class II</b> | <b>CD8/ Class I</b> | <b>All B cell</b> | <b>Linear B cell</b> | <b>Non-linear B cell</b> | <b>Total Epitopes</b> |
|-----------------------------------------------------------------------------------------------------------------------------------------------------------|-------------------|----------------------|---------------------|-------------------|----------------------|--------------------------|-----------------------|
| <b>Plants</b>                                                                                                                                             |                   |                      |                     |                   |                      |                          |                       |
| Latex<br>Rubber tree ( <i>Hevea brasiliensis</i> )                                                                                                        | 43                | 19                   | 0                   | 164               | 156                  | 8                        | <b>207</b>            |
| <b>Metals</b>                                                                                                                                             |                   |                      |                     |                   |                      |                          |                       |
| Nickel                                                                                                                                                    | 8                 | 4                    | 3                   | 0                 | NA                   | NA                       | <b>8</b>              |
| Copper                                                                                                                                                    | 6                 | 4                    | 2                   | 0                 | NA                   | NA                       | <b>6</b>              |
| Cobalt                                                                                                                                                    | 6                 | 4                    | 1                   | 0                 | NA                   | NA                       | <b>6</b>              |
| Zinc dichloride                                                                                                                                           | 3                 | 2                    | 1                   | 0                 | NA                   | NA                       | <b>3</b>              |
| Beryllium                                                                                                                                                 | 3                 | 3                    | 0                   | 0                 | NA                   | NA                       | <b>3</b>              |
| Palladium                                                                                                                                                 | 5                 | 5                    | 0                   | 0                 | NA                   | NA                       | <b>3</b>              |
| Chromium                                                                                                                                                  | 2                 | 2                    | 0                   | 0                 | NA                   | NA                       | <b>2</b>              |
| <b>Chemical Agents from Occupational Exposure</b>                                                                                                         |                   |                      | 0                   |                   |                      |                          |                       |
| 1-fluoro-2,4-dinitrobenzene (DNFB)                                                                                                                        | 6                 | 3                    | 3                   | 1                 | NA                   | NA                       | <b>7</b>              |
| 1,4-benzoquinone                                                                                                                                          | 3                 | 1                    | 1                   | 1                 | NA                   | NA                       | <b>4</b>              |
| 1,4-phenylenediamine                                                                                                                                      | 4                 | 2                    | 1                   | 0                 | NA                   | NA                       | <b>4</b>              |
| 4-aminophenol                                                                                                                                             | 4                 | 1                    | 1                   | 0                 | NA                   | NA                       | <b>4</b>              |
| 2,4-dinitro-1-thiocyanobenzene                                                                                                                            | 2                 | 1                    | 1                   | 1                 | NA                   | NA                       | <b>3</b>              |
| 4-methylaminophenol sulfate                                                                                                                               | 3                 | 1                    | 1                   | 0                 | NA                   | NA                       | <b>3</b>              |
| ABA diazonium                                                                                                                                             | 3                 | 1                    | 2                   | 0                 | NA                   | NA                       | <b>3</b>              |
| Alizarin (dye)                                                                                                                                            | 0                 | 0                    | 0                   | 1                 | NA                   | NA                       | <b>3</b>              |
| Bandrowski's base (dye)                                                                                                                                   | 3                 | 2                    | 1                   | 0                 | NA                   | NA                       | <b>3</b>              |
| 1,3-dicyclohexylcarbodiimide                                                                                                                              | 2                 | 0                    | 0                   | 0                 | NA                   | NA                       | <b>2</b>              |
| 2,4-dinitrobenzenesulfonate                                                                                                                               | 2                 | 1                    | 1                   | 0                 | NA                   | NA                       | <b>2</b>              |
| Aniline                                                                                                                                                   | 2                 | 2                    | 0                   | 0                 | NA                   | NA                       | <b>2</b>              |
| 2-aminophenol                                                                                                                                             | 2                 | 2                    | 0                   | 0                 | NA                   | NA                       | <b>2</b>              |
| 1,3-phenylenediamine                                                                                                                                      | 2                 | 1                    | 1                   | 0                 | NA                   | NA                       | <b>2</b>              |
| 2-hydroxypropyl methacrylate                                                                                                                              | 2                 | 1                    | 0                   | 0                 | NA                   | NA                       | <b>2</b>              |
| 6-(4-hydroxy-5-iodo-3-nitrobenzamido)hexanoic acid                                                                                                        | 0                 | 0                    | 0                   | 2                 | NA                   | NA                       | <b>2</b>              |
| Ethylene glycol dimethacrylate                                                                                                                            | 2                 | 1                    | 0                   | 0                 | NA                   | NA                       | <b>2</b>              |
| Methyl methacrylate                                                                                                                                       | 2                 | 1                    | 0                   | 0                 | NA                   | NA                       | <b>2</b>              |
| N-methylethanolamine                                                                                                                                      | 0                 | 0                    | 0                   | 2                 | NA                   | NA                       | <b>2</b>              |
| Ethylamine                                                                                                                                                | 0                 | 0                    | 0                   | 2                 | NA                   | NA                       | <b>2</b>              |
| 4,4'-diaminoazobenzene                                                                                                                                    | 1                 | 1                    | 0                   | 0                 | NA                   | NA                       | <b>1</b>              |
| 4,4'-diaminodiphenylmethane                                                                                                                               | 1                 | 1                    | 0                   | 0                 | NA                   | NA                       | <b>1</b>              |
| 4-bromo-1-hydroxyanthraquinone-2-carboxylic acid                                                                                                          | 0                 | 0                    | 0                   | 1                 | NA                   | NA                       | <b>1</b>              |
| 3-aminophenol                                                                                                                                             | 0                 | 0                    | 0                   | 1                 | NA                   | NA                       | <b>1</b>              |
| 6-(4-hydroxy-3-nitrobenzamido)hexanoic acid                                                                                                               | 0                 | 0                    | 0                   | 1                 | NA                   | NA                       | <b>1</b>              |
| 1,2-phenylenediamine                                                                                                                                      | 1                 | 1                    | 0                   | 0                 | NA                   | NA                       | <b>1</b>              |
| Acenaphthene-1,2-dione                                                                                                                                    | 0                 | 0                    | 0                   | 1                 | NA                   | NA                       | <b>1</b>              |
| 2-hydroxyethyl methacrylate                                                                                                                               | 1                 | 1                    | 0                   | 0                 | NA                   | NA                       | <b>1</b>              |
| Anilide                                                                                                                                                   | 0                 | 0                    | 0                   | 1                 | NA                   | NA                       | <b>1</b>              |
| 4-(2-hydroxy-5-methylphenylazo)acetanilide                                                                                                                | 1                 | 1                    | 0                   | 0                 | NA                   | NA                       | <b>1</b>              |
| anthraflavin                                                                                                                                              | 0                 | 0                    | 0                   | 1                 | NA                   | NA                       | <b>1</b>              |
| 2-[(2-([2-([3-[2,2,6,6-tetramethyl-1-(ylloxy)piperidin-4-ylamino]phenyl)amino)ethyl]amino)-2-oxoethoxy)acetamido]ethyl 1,2-dipalmitoylglycero-3-phosphate | 0                 | 0                    | 0                   | 1                 | NA                   | NA                       | <b>1</b>              |

|                                                          |    |   |   |   |    |    |    |
|----------------------------------------------------------|----|---|---|---|----|----|----|
| Bismark Brown Y (dye)                                    | 1  | 1 | 0 | 0 | NA | NA | 1  |
| Cetyltrimethylammonium chloride                          | 0  | 0 | 0 | 1 | NA | NA | 1  |
| Coniferol                                                | 0  | 0 | 0 | 1 | NA | NA | 1  |
| Ethyl acetate                                            | 0  | 0 | 0 | 1 | NA | NA | 1  |
| Nitrosobenzene                                           | 1  | 1 | 0 | 0 | NA | NA | 1  |
| Purpurin (dye)                                           | 0  | 0 | 0 | 1 | NA | NA | 1  |
| Sodium 2,4-dinitrobenzenesulfonate                       | 0  | 0 | 0 | 1 | NA | NA | 1  |
| <b>Model Haptens</b>                                     |    |   |   |   |    |    |    |
| 2,4-dinitrophenol (DNP)                                  | 10 | 5 | 5 | 3 | NA | NA | 13 |
| Dinitrochlorobenzene (DNCB)                              | 8  | 3 | 3 | 3 | NA | NA | 11 |
| 2,4,6-trinitrobenzenesulfonic acid                       | 7  | 4 | 3 | 0 | NA | NA | 7  |
| 2,4,6-trinitrophenyl group (TNP)                         | 7  | 4 | 3 | 2 | NA | NA | 7  |
| N(6)-(2,4-dinitrophenyl)-L-lysine                        | 3  | 1 | 1 | 3 | NA | NA | 6  |
| 1-chloro-2,4,6-trinitrobenzene                           | 5  | 2 | 2 | 0 | NA | NA | 5  |
| 2,4-dinitrobenzenesulfonic acid                          | 4  | 2 | 2 | 0 | NA | NA | 4  |
| (4-hydroxy-5-iodo-3-nitrophenyl)acetyl group             | 2  | 0 | 2 | 1 | NA | NA | 3  |
| (4-hydroxy-3-nitrophenyl)acetyl group                    | 1  | 0 | 0 | 1 | NA | NA | 2  |
| 4,4'-azodibenzeneearsonic acid                           | 1  | 0 | 0 | 1 | NA | NA | 2  |
| 4-arsonophenyldiazenyl group                             | 1  | 0 | 0 | 1 | NA | NA | 2  |
| N-acetyltyrosine-4-azobenzeneearsonate                   | 2  | 2 | 0 | 0 | NA | NA | 2  |
| N-(2,4-dinitro-6-carboxy)phenyl-1.6-diaminohexane        | 0  | 0 | 0 | 1 | NA | NA | 1  |
| N-(2,4-dinitrophenyl)aminohexanoic acid                  | 0  | 0 | 0 | 1 | NA | NA | 1  |
| 4-hydroxy-5-iodo-3-nitrophenylacetyl-O-succinimide ester | 1  | 0 | 1 | 0 | NA | NA | 1  |
| Picric acid                                              | 0  | 0 | 0 | 1 | NA | NA | 1  |
| 1,3-diisopropylcarbodiimide                              | 1  | 0 | 0 | 0 | NA | NA | 1  |
