# Supplementary material for: Towards Defining Molecular Determinants Recognized by Adaptive Immunity in Allergic Disease: An Inventory of the Available Data
Source: PubMed Central journal article supplement (PMC3042621; doi:10.1155/2010/628026), 2011-02-13
Supplement: 628026.f4.pdf [file 628026.f4.pdf]

**Supplementary Table 3. Epitope Distribution in Different Airborne Allergens**

|                                  | Name                                       | T cell | B cell   | Total Epitopes |
|----------------------------------|--------------------------------------------|--------|----------|----------------|
| <b>Common Airborne Allergens</b> |                                            |        |          |                |
| <i>Aspergillus fumigatus</i>     | Major allergen Asp f 2                     | 6      | 93       | <b>99</b>      |
|                                  | Ribonuclease mitogillin                    | 8      | 5        | <b>13</b>      |
|                                  | Allergen                                   | 12     | 0        | <b>12</b>      |
|                                  | Oryzin precursor                           | 0      | 9        | <b>9</b>       |
|                                  | Allergen I/a; Asp f I/a                    | 1      | 3        | <b>4</b>       |
|                                  | Cellular serine proteinase                 | 0      | 1        | <b>1</b>       |
|                                  | Major allergen I                           | 0      | 1        | <b>1</b>       |
|                                  | Major allergen Asp f 1                     | 0      | 1        | <b>1</b>       |
|                                  | Allergen Asp f 4                           | 0      | 1        | <b>1</b>       |
| Superoxide dismutase             | 0                                          | 1      | <b>1</b> |                |
| Timothy grass                    | Phl p 1                                    | 84     | 40       | <b>124</b>     |
|                                  | Phl p 5                                    | 60     | 1        | <b>61</b>      |
|                                  | Phl p 3                                    | 10     | 0        | <b>10</b>      |
|                                  | Phl p 4                                    | 9      | 0        | <b>9</b>       |
|                                  | Phl p 2                                    | 7      | 1        | <b>8</b>       |
|                                  | Phl p 12 (Profilin-2/4)                    | 1      | 5        | <b>6</b>       |
|                                  | Phl p 13 (Polygalacturonase)               | 5      | 0        | <b>5</b>       |
|                                  | Phl p 7 (Polcalcin)                        | 0      | 2        | <b>2</b>       |
|                                  | Phl p 11                                   | 1      | 0        | <b>1</b>       |
| Silver birch                     | Bet v 1                                    | 175    | 16       | <b>191</b>     |
|                                  | Profilin (Bet v 2)                         | 0      | 18       | <b>18</b>      |
|                                  | Bet v 4                                    | 0      | 2        | <b>2</b>       |
| Annual ragweed                   | Amb a 3                                    | 4      | 9        | <b>13</b>      |
|                                  | Amb a 5                                    | 8      | 0        | <b>8</b>       |
|                                  | Amb a 2                                    | 1      | 2        | <b>3</b>       |
|                                  | Amb a 1.1                                  | 1      | 1        | <b>2</b>       |
|                                  | Amb a 1.4                                  | 0      | 1        | <b>1</b>       |
| Japanese cedar                   | Cry j 1                                    | 27     | 2        | <b>29</b>      |
|                                  | Cry j IB                                   | 11     | 0        | <b>11</b>      |
|                                  | Cry j 2                                    | 5      | 0        | <b>5</b>       |
|                                  | Polygalacturonase                          | 77     | 9        | <b>86</b>      |
|                                  | Sugi basic protein                         | 60     | 15       | <b>75</b>      |
| Perennial ryegrass               | Lol p 1                                    | 46     | 13       | <b>59</b>      |
|                                  | Lol p 2-A                                  | 0      | 2        | <b>2</b>       |
|                                  | Lol p 3                                    | 0      | 1        | <b>1</b>       |
|                                  | Lol p VA                                   | 23     | 20       | <b>43</b>      |
| Bermuda grass                    | Cyn d 1                                    | 23     | 1        | <b>24</b>      |
|                                  | Cyn d 1 isoallergen isoform 1              | 0      | 1        | <b>1</b>       |
|                                  | Cyn d 1 isoallergen isoform 3              | 0      | 1        | <b>1</b>       |
| American House dust mite         | Der f 1                                    | 22     | 0        | <b>22</b>      |
|                                  | Der f 2                                    | 8      | 9        | <b>17</b>      |
|                                  | Allergen Mag                               | 3      | 3        | <b>6</b>       |
|                                  | Mag3                                       | 3      | 0        | <b>3</b>       |
| European House dust mite         | Der p 2                                    | 56     | 32       | <b>88</b>      |
|                                  | Der p 1                                    | 46     | 22       | <b>68</b>      |
| Spreading pellitory              | Probable non-spec lipid-transfer protein 2 | 0      | 35       | <b>35</b>      |
|                                  | Probable non-spec lipid-transfer protein   | 1      | 25       | <b>26</b>      |
|                                  | Par j                                      | 0      | 1        | <b>1</b>       |
| Ashe juniper                     | Jun a 1                                    | 0      | 10       | <b>10</b>      |
|                                  | Pathogenesis-related protein               | 0      | 3        | <b>3</b>       |
| Japanese cypress                 | Polygalacturonase                          | 34     | 0        | <b>34</b>      |
|                                  | Cha o 1                                    | 28     | 1        | <b>29</b>      |

|                                |                                 |    |    |           |
|--------------------------------|---------------------------------|----|----|-----------|
| Olive tree                     | Ole e 1                         | 14 | 39 | <b>53</b> |
|                                | Beta-1,3-glucanase-like protein | 0  | 26 | <b>26</b> |
| Cat                            | Fel d 1 (Major allergen I)      | 48 | 18 | <b>66</b> |
| Dog                            | Can f 1                         | 50 | 0  | <b>50</b> |
| Horse                          | Equ c 1                         | 43 | 1  | <b>44</b> |
| Midge                          | Globin Ctt 3-1                  | 3  | 2  | <b>5</b>  |
| <b>Other Plant Species</b>     |                                 |    |    |           |
| Mouse ear cress                | Putative pectate lyase 17       | 1  | 0  | <b>1</b>  |
|                                | Probable pectate lyase 18       | 1  | 0  | <b>1</b>  |
| Common velvet grass            | Group V allergen                | 0  | 8  | <b>8</b>  |
|                                | Hol I 1                         | 0  | 6  | <b>6</b>  |
| Cereal rye                     | Sec1                            | 0  | 49 | <b>49</b> |
|                                | Gamma-70 secalin isoform P4-12  | 0  | 1  | <b>1</b>  |
| Tobacco                        | Pectate lyase                   | 0  | 1  | <b>1</b>  |
|                                | Cyclin-dependent kinase B1-1    | 0  | 1  | <b>1</b>  |
| Kentucky bluegrass             | Pollen allergen KBG 60          | 18 | 34 | <b>52</b> |
| Mugwort                        | Art v 1                         | 19 | 0  | <b>19</b> |
| Sunflower                      | Profilin                        | 0  | 18 | <b>18</b> |
| Great ragweed                  | Amb t 5                         | 6  | 0  | <b>6</b>  |
| Loblolly pine                  | Allergen                        | 0  | 4  | <b>4</b>  |
| Lichwort                       | Par j                           | 0  | 2  | <b>2</b>  |
| Arizona cypress                | Cup a 1                         | 0  | 1  | <b>1</b>  |
| Formosan juniper               | Allergen                        | 0  | 1  | <b>1</b>  |
| Tall fescue                    | FeS e I                         | 0  | 1  | <b>1</b>  |
| Carrot                         | Dau c 1                         | 1  | 0  | <b>1</b>  |
| Elegant zinnia                 | Pectate lyase                   | 1  | 0  | <b>1</b>  |
| <b>Other Fungal Species</b>    |                                 |    |    |           |
| <i>P. brasiliensis</i>         | 43 kDa secreted glycoprotein    | 11 | 0  | <b>11</b> |
|                                | Immunodominant antigen Gp43     | 5  | 1  | <b>6</b>  |
|                                | Immunodominant antigen Gp43     | 0  | 1  | <b>1</b>  |
| <i>Penicillium chrysogenum</i> | Alkaline serine protease        | 0  | 30 | <b>30</b> |
|                                | Pen n 18                        | 0  | 15 | <b>15</b> |
| <i>Alternaria alternata</i>    | Major allergen Alt a 1          | 0  | 5  | <b>5</b>  |
| <i>Malassezia sympodialis</i>  | Manganese superoxide dismutase  | 0  | 1  | <b>1</b>  |
| <i>Candida albicans</i>        | Enolase 1                       | 0  | 1  | <b>1</b>  |
| <i>Aspergillus restrictus</i>  | Ribonuclease mitogillin p       | 0  | 1  | <b>1</b>  |
| <b>Other Animal Species</b>    |                                 |    |    |           |
| Rat                            | Major urinary protein precursor | 19 | 0  | <b>19</b> |
|                                | Ig epsilon chain C region       | 0  | 2  | <b>2</b>  |
|                                | Cytochrome P450 3A1             | 0  | 2  | <b>2</b>  |
| Storage mite                   | Blo t 5                         | 0  | 17 | <b>17</b> |
|                                | Paramyosin                      | 0  | 1  | <b>1</b>  |
| Fodder mite                    | Lep d 2                         | 10 | 5  | <b>15</b> |
| American cockroach             | Allergen Cr-PI                  | 0  | 4  | <b>4</b>  |
|                                | Cr-P11 allergen (Per a 1)       | 0  | 2  | <b>2</b>  |
|                                | Cr-P11 allergen                 | 0  | 1  | <b>1</b>  |
|                                | Per a 4 allergen variant 1      | 0  | 1  | <b>1</b>  |
|                                | Cr-P11 protein                  | 0  | 1  | <b>1</b>  |
| German cockroach               | Bla g 5                         | 15 | 0  | <b>15</b> |
|                                | Bla g 4                         | 0  | 8  | <b>8</b>  |

|                         |         |   |   |           |
|-------------------------|---------|---|---|-----------|
|                         | Bla g 2 | 0 | 2 | <b>2</b>  |
| Cow dander              | Bos d 2 | 8 | 2 | <b>10</b> |
| Mayne's house dust mite | Eur m 1 | 9 | 0 | <b>9</b>  |
| Mouse                   | Naca    | 0 | 4 | <b>4</b>  |
|                         |         |   |   |           |
