# Supplementary material for: Towards Defining Molecular Determinants Recognized by Adaptive Immunity in Allergic Disease: An Inventory of the Available Data
Source: PubMed Central journal article supplement (PMC3042621; doi:10.1155/2010/628026), 2011-02-13
Supplement: 628026.f5.pdf [file 628026.f5.pdf]

**Supplementary Table 4. Epitope Distribution Among Stinging Insects**

| <b>Organism Name</b>        | <b>Name</b>              | <b>T cell</b> | <b>B cell</b> | <b>Overall</b> |
|-----------------------------|--------------------------|---------------|---------------|----------------|
| <i>Honey bee</i>            | Phospholipase A2         | 47            | 4             | <b>51</b>      |
|                             | Melittin (Api m III)     | 4             | 7             | <b>11</b>      |
|                             | Apamine                  | 0             | 1             | <b>1</b>       |
|                             | Hyaluronoglucosaminidase | 0             | 1             | <b>1</b>       |
| <i>Common wasp</i>          | Venom allergen 5         | 36            | 0             | <b>36</b>      |
| <i>Bald-faced hornet</i>    | Venom allergen 5.01      | 20            | 11            | <b>31</b>      |
| <i>Jack jumper ant</i>      | Major allergen Myr p 1   | 0             | 2             | <b>2</b>       |
| <i>Black-bellied hornet</i> | Mastoparan-B             | 0             | 1             | <b>1</b>       |
