# Supplementary material for: Towards Defining Molecular Determinants Recognized by Adaptive Immunity in Allergic Disease: An Inventory of the Available Data
Source: PubMed Central journal article supplement (PMC3042621; doi:10.1155/2010/628026), 2011-02-13
Supplement: 628026.f6.pdf [file 628026.f6.pdf]

**Supplementary Table 5. Epitope Distribution for Latex Allergens**

| <b>Organism Name</b> | <b>Name</b>                      | <b>T cell</b> | <b>B cell</b> | <b>Overall</b> |
|----------------------|----------------------------------|---------------|---------------|----------------|
| Latex                | Pro-hevein                       | 9             | 87            | <b>96</b>      |
|                      | Major latex allergen (Hev b 5)   | 15            | 39            | <b>54</b>      |
|                      | Rubber elongation factor protein | 9             | 18            | <b>27</b>      |
|                      | Small rubber particle protein    | 10            | 11            | <b>21</b>      |
|                      | beta-1,3-glucanase               | 0             | 9             | <b>9</b>       |
