# Supplementary material for: Towards Defining Molecular Determinants Recognized by Adaptive Immunity in Allergic Disease: An Inventory of the Available Data
Source: PubMed Central journal article supplement (PMC3042621; doi:10.1155/2010/628026), 2011-02-13
Supplement: 628026.f7.pdf [file 628026.f7.pdf]

**Supplementary Table 6. Carbohydrate epitopes associated with allergic reactions.**

| Carbohydrate/Sugar Name                                                                                                                                      | Source and Allergen              | Category        | Host           | Response  |
|--------------------------------------------------------------------------------------------------------------------------------------------------------------|----------------------------------|-----------------|----------------|-----------|
| $\alpha$ -1,3-fucose                                                                                                                                         | Honey bee venom glycoprotein     | Stinging Insect | Rabbit         | IgG       |
| N(4)-[ $\alpha$ -L-fucosyl-(1->3)-N-acetyl-4-O-glycosyl-D-glucosaminy]-L-asparagine residue                                                                  | Honey bee venom phospholipase A2 | Stinging Insect | Human          | IgE       |
| $\alpha$ -D-fucose                                                                                                                                           | Celery glycoprotein              | Food            | Human          | IgE       |
| Fuc- $\alpha$ -(1->3)-[Man- $\alpha$ -(1->6)-[Xyl- $\beta$ -(1->2)]-Man- $\beta$ -(1->4)-GlcNAc- $\beta$ -(1->4)]-GlcNAc                                     | Celery glycoprotein              | Food            | Human          | IgE       |
| methyl $\beta$ -D-glucuronoside                                                                                                                              | Beet arabinogalactan             | Food            | Mouse          | mAb       |
| $\beta$ -D-GlcpA-(1->3)- $\alpha$ -D-GalpA-(1->2)-L-Rha                                                                                                      | Beet arabinogalactan             | Food            | Mouse          | mAb       |
| tetragalactose                                                                                                                                               | Beet arabinogalactan             | Food            | Mouse          | IgG2c     |
| $\alpha$ -L-Fuc-(1->3)-[ $\alpha$ -D-Man-(1->3)-[ $\alpha$ -D-Man-(1->6)]- $\beta$ -D-Xyl-(1->2)]- $\beta$ -D-Man-(1->4)- $\beta$ -D-GlcNAc-(1->4)]-D-GlcNAc | Cedar pollen Cry j 1             | Airborne        | Mouse          | IgG2c     |
| Mono- $\beta$ -arabinofuranose                                                                                                                               | Mugwort pollen Art v 1           | Airborne        | Human          | IgE       |
| D-glucopyranuronic acid                                                                                                                                      | Fungus polysaccharide            | Airborne        | BALB/c, Rabbit | mAb, Sera |
| $\alpha$ -D-galactosyl-(1->3)-D-galactose ( $\alpha$ -gal)                                                                                                   | Beef                             | Food            | Human          | IgE       |
| xylitol                                                                                                                                                      | Food additive                    | Food            | Rabbit         | PCA IgE   |
| D-GalNAc-(1->3)-[D-GalNAc-(1->4)]-D-GalNAc-(1->3)-D-GalNAc-ol                                                                                                | Sea Squirt H antigen             | Food            | Human          | PCA IgE   |
| D-GalNAc-(1->3)-[D-GalNAc-(1->2)-L-Fuc-(1->4)]-D-GlcNAc-(1->3)-D-GalNAc-ol                                                                                   | Sea Squirt H antigen             | Food            | Human          | PCA IgE   |
| D-GalNAc-(1->4)-D-GlcNAc-(1->3)-[D-GalNAc-(1->4)-D-GlcNAc-(1->6)]-D-GalNAc-ol                                                                                | Sea Squirt H antigen             | Food            | Human          | PCA IgE   |
| D-GalNAc-(1->4)-D-GlcNAc-(1->6)-[D-GalNAc-(1->4)-[L-Fuc-(1->3)]-D-GlcNAc-(1->3)]-D-GalNAc-ol                                                                 | Sea Squirt H antigen             | Food            | Human          | PCA IgE   |
| D-GalNAc-(1->4)-[L-Fuc-(1->3)]D-GlcNAc-(1->3)-[D-GalNAc-(1->4)-[L-Fuc-(1->3)]-D-GlcNAc-(1->6)]-D-GalNAc-ol                                                   | Sea Squirt H antigen             | Food            | Human          | PCA IgE   |
